# Supplementary material for: Seismic Hazard in Greece: A Comparative Study for the Region of East Macedonia and Thrace
Source: MDPI journal article supplement (doi:10.3390/geohazards4030014), 2023-06-30
Supplement: s1 [file s1]

**Table S1.** Most contributing seismic scenarios for Alexandroupoli for a return period of 475 years.

| IM                |     | PGA    |            |     | PGV    |            | Sa (0.15 s) |        |            |
|-------------------|-----|--------|------------|-----|--------|------------|-------------|--------|------------|
| SM                | M   | R (km) | $\epsilon$ | M   | R (km) | $\epsilon$ | M           | R (km) | $\epsilon$ |
| SHARE_Area        | 6.1 | 17     | 1.3        | 5.9 | 11     | 0.9        | 5.1         | 13     | 1.5        |
| SHARE_FB          | 6.3 | 23     | 1.7        | 6.3 | 23     | 1.9        | 6.3         | 23     | 1.7        |
| PZ01_SHAREB       | 6.3 | 3      | 0.1        | 6.3 | 3      | 0.1        | 6.3         | 3      | 0.1        |
| TAP faults_SHAREB | 6.3 | 3      | 0.1        | 6.3 | 3      | 0.1        | 6.3         | 3      | 0.1        |

**Table S2.** Most contributing seismic scenarios for Drama for a return period of 475 years.

| IM                |     | PGA    |            |     | PGV    |            | Sa (0.15 s) |        |            |
|-------------------|-----|--------|------------|-----|--------|------------|-------------|--------|------------|
| SM                | M   | R (km) | $\epsilon$ | M   | R (km) | $\epsilon$ | M           | R (km) | $\epsilon$ |
| SHARE_Area        | 5.5 | 11     | 0.7        | 5.5 | 11     | 0.9        | 5.5         | 11     | 0.7        |
| SHARE_FB          | 5.1 | 11     | 1.3        | 6.5 | 5      | -0.1       | 5.1         | 11     | 1.3        |
| PZ01_SHAREB       | 7.1 | 7      | 0.1        | 6.9 | 7      | -0.1       | 7.1         | 7      | 0.3        |
| TAP faults_SHAREB | 6.3 | 5      | 0.1        | 6.3 | 5      | 0.1        | 6.3         | 5      | 0.1        |

**Table S3.** Most contributing seismic scenarios for Kavala for a return period of 475 years.

| IM                |     | PGA    |            |     | PGV    |            | Sa (0.15 s) |        |            |
|-------------------|-----|--------|------------|-----|--------|------------|-------------|--------|------------|
| SM                | M   | R (km) | $\epsilon$ | M   | R (km) | $\epsilon$ | M           | R (km) | $\epsilon$ |
| SHARE_Area        | 4.9 | 13     | 1.3        | 5.5 | 11     | 0.5        | 4.9         | 13     | 1.3        |
| SHARE_FB          | 4.9 | 13     | 1.3        | 5.7 | 11     | 0.7        | 4.9         | 13     | 1.3        |
| PZ01_SHAREB       | 4.9 | 13     | 1.3        | 5.7 | 11     | 0.7        | 4.9         | 13     | 1.3        |
| TAP faults_SHAREB | 4.9 | 13     | 1.5        | 5.7 | 11     | 0.7        | 4.9         | 13     | 1.5        |

**Table S4.** Most contributing seismic scenarios for Komotini for a return period of 475 years.

| IM                |     | PGA    |            |     | PGV    |            | Sa (0.15 s) |        |            |
|-------------------|-----|--------|------------|-----|--------|------------|-------------|--------|------------|
| SM                | M   | R (km) | $\epsilon$ | M   | R (km) | $\epsilon$ | M           | R (km) | $\epsilon$ |
| SHARE_Area        | 6.1 | 11     | 0.5        | 6.1 | 11     | 0.5        | 6.1         | 11     | 0.7        |
| SHARE_FB          | 5.1 | 11     | 1.5        | 5.9 | 9      | 0.7        | 5.1         | 11     | 1.5        |
| PZ01_SHAREB       | 6.1 | 1      | -0.1       | 6.1 | 1      | -0.1       | 6.1         | 1      | -0.1       |
| TAP faults_SHAREB | 6.1 | 5      | 0.1        | 6.1 | 5      | 0.1        | 6.1         | 5      | 0.1        |

**Table S5.** Most contributing seismic scenarios for Samothraki for a return period of 475 years.

| IM                |     | PGA    |            |     | PGV    |            | Sa (0.15 s) |        |            |
|-------------------|-----|--------|------------|-----|--------|------------|-------------|--------|------------|
| SM                | M   | R (km) | $\epsilon$ | M   | R (km) | $\epsilon$ | M           | R (km) | $\epsilon$ |
| SHARE_Area        | 6.1 | 9      | 0.7        | 6.1 | 9      | 0.7        | 6.1         | 9      | 0.9        |
| SHARE_FB          | 5.7 | 11     | 1.1        | 7.1 | 21     | 1.1        | 5.7         | 11     | 1.1        |
| PZ01_SHAREB       | 5.7 | 11     | 1.5        | 5.7 | 11     | 1.5        | 5.7         | 11     | 1.5        |
| TAP faults_SHAREB | 6.3 | 5      | 0.9        | 6.9 | 21     | 1.1        | 6.3         | 5      | 0.9        |

**Table S6.** Most contributing seismic scenarios for Xanthi for a return period of 475 years.

| IM                | PGA |        |            | PGV |        |            | Sa (0.15 s) |        |            |
|-------------------|-----|--------|------------|-----|--------|------------|-------------|--------|------------|
| SM                | M   | R (km) | $\epsilon$ | M   | R (km) | $\epsilon$ | M           | R (km) | $\epsilon$ |
| SHARE_Area        | 5.7 | 11     | 0.5        | 5.7 | 11     | 0.5        | 4.9         | 13     | 1.7        |
| SHARE_FB          | 4.9 | 13     | 1.7        | 5.9 | 11     | 0.7        | 4.9         | 13     | 1.7        |
| PZ01_SHAREB       | 6.1 | 5      | 0.1        | 6.1 | 5      | 0.1        | 6.1         | 5      | 0.3        |
| TAP faults_SHAREB | 6.3 | 1      | -0.1       | 6.3 | 1      | -0.1       | 6.3         | 1      | -0.1       |

**Table S7.** Most contributing seismic scenarios for Alexandroupoli for a return period of 955 years.

| IM                | PGA |        |            | PGV |        |            | Sa (0.15 s) |        |            |
|-------------------|-----|--------|------------|-----|--------|------------|-------------|--------|------------|
| SM                | M   | R (km) | $\epsilon$ | M   | R (km) | $\epsilon$ | M           | R (km) | $\epsilon$ |
| SHARE_Area        | 6.1 | 17     | 1.3        | 5.9 | 11     | 0.9        | 5.1         | 13     | 1.5        |
| SHARE_FB          | 6.3 | 23     | 1.7        | 6.3 | 23     | 1.9        | 6.3         | 23     | 1.7        |
| PZ01_SHAREB       | 6.3 | 3      | 0.1        | 6.3 | 3      | 0.1        | 6.3         | 3      | 0.1        |
| TAP faults_SHAREB | 6.3 | 3      | 0.1        | 6.3 | 3      | 0.1        | 6.3         | 3      | 0.1        |

**Table S8.** Most contributing seismic scenarios for Drama for a return period of 955 years.

| IM                | PGA |        |            | PGV |        |            | Sa (0.15 s) |        |            |
|-------------------|-----|--------|------------|-----|--------|------------|-------------|--------|------------|
| SM                | M   | R (km) | $\epsilon$ | M   | R (km) | $\epsilon$ | M           | R (km) | $\epsilon$ |
| SHARE_Area        | 5.5 | 11     | 1.1        | 5.5 | 11     | 1.3        | 5.5         | 11     | 1.1        |
| SHARE_FB          | 6.5 | 5      | 0.3        | 6.5 | 5      | 0.3        | 6.5         | 5      | 0.5        |
| PZ01_SHAREB       | 6.7 | 7      | 0.7        | 7.1 | 7      | 0.3        | 6.9         | 7      | 0.9        |
| TAP faults_SHAREB | 6.3 | 5      | 0.5        | 6.3 | 5      | 0.5        | 6.3         | 5      | 0.5        |

**Table S9.** Most contributing seismic scenarios for Kavala for a return period of 955 years.

| IM                | PGA |        |            | PGV |        |            | Sa (0.15 s) |        |            |
|-------------------|-----|--------|------------|-----|--------|------------|-------------|--------|------------|
| SM                | M   | R (km) | $\epsilon$ | M   | R (km) | $\epsilon$ | M           | R (km) | $\epsilon$ |
| SHARE_Area        | 5.5 | 11     | 0.7        | 5.5 | 11     | 0.9        | 5.5         | 11     | 0.7        |
| SHARE_FB          | 5.7 | 11     | 1.1        | 5.7 | 11     | 1.1        | 5.7         | 11     | 1.1        |
| PZ01_SHAREB       | 4.9 | 13     | 1.7        | 5.7 | 11     | 1.1        | 4.9         | 13     | 1.7        |
| TAP faults_SHAREB | 5.7 | 11     | 1.1        | 5.7 | 11     | 1.1        | 5.7         | 11     | 1.1        |

**Table S10.** Most contributing seismic scenarios for Komotini for a return period of 955 years.

| IM                | PGA |        |            | PGV |        |            | Sa (0.15 s) |        |            |
|-------------------|-----|--------|------------|-----|--------|------------|-------------|--------|------------|
| SM                | M   | R (km) | $\epsilon$ | M   | R (km) | $\epsilon$ | M           | R (km) | $\epsilon$ |
| SHARE_Area        | 6.1 | 11     | 1.3        | 6.1 | 11     | 1.3        | 6.1         | 11     | 1.3        |
| SHARE_FB          | 6.3 | 7      | 0.7        | 6.3 | 7      | 0.7        | 6.3         | 7      | 0.7        |
| PZ01_SHAREB       | 6.1 | 1      | 0.3        | 6.1 | 1      | 0.7        | 6.1         | 1      | 0.3        |
| TAP faults_SHAREB | 6.1 | 5      | 0.7        | 6.3 | 5      | 0.5        | 6.1         | 5      | 0.7        |

**Table S11.** Most contributing seismic scenarios for Samothraki for a return period of 955 years.

| IM                | PGA |        |            | PGV |        |            | Sa (0.15 s) |        |            |
|-------------------|-----|--------|------------|-----|--------|------------|-------------|--------|------------|
| SM                | M   | R (km) | $\epsilon$ | M   | R (km) | $\epsilon$ | M           | R (km) | $\epsilon$ |
| SHARE_Area        | 6.1 | 9      | 1.1        | 6.1 | 9      | 1.1        | 6.1         | 9      | 1.1        |
| SHARE_FB          | 6.1 | 9      | 1.1        | 7.1 | 21     | 1.3        | 5.7         | 11     | 1.7        |
| PZ01_SHAREB       | 5.7 | 11     | 1.7        | 5.7 | 11     | 1.7        | 5.7         | 11     | 1.7        |
| TAP faults_SHAREB | 6.3 | 5      | 1.1        | 7.1 | 21     | 1.3        | 6.3         | 5      | 1.3        |

**Table S12.** Most contributing seismic scenarios for Xanthi for a return period of 955 years.

| IM                | PGA |        |            | PGV |        |            | Sa (0.15 s) |        |            |
|-------------------|-----|--------|------------|-----|--------|------------|-------------|--------|------------|
| SM                | M   | R (km) | $\epsilon$ | M   | R (km) | $\epsilon$ | M           | R (km) | $\epsilon$ |
| SHARE_Area        | 5.7 | 11     | 0.9        | 5.7 | 11     | 1.1        | 5.7         | 11     | 0.9        |
| SHARE_FB          | 6.1 | 9      | 0.9        | 6.1 | 9      | 0.9        | 6.1         | 9      | 0.9        |
| PZ01_SHAREB       | 6.3 | 5      | 0.5        | 6.3 | 5      | 0.5        | 6.3         | 5      | 0.5        |
| TAP faults_SHAREB | 6.3 | 1      | -0.1       | 6.3 | 1      | 0.1        | 6.3         | 1      | -0.1       |
